# Supplementary material for: Effect of Using Different Chemical Dispersing Agents in Grain Size Analyses of Fluvial Sediments via Laser Diffraction Spectrometry
Source: MDPI journal article supplement (doi:10.3390/mps4030044), 2021-06-29
Supplement: s1 [file s1]

**Table S1.** Mean grain size and percentage of grain size fractions determined through the use of distilled water for the sediment samples of the Spitzbrunnen (SB) core.

| Sample ID | Depth (cm) | Mean grain size ( $\mu\text{m}$ ) | Clay (%) | Fine Silt (%) | Medium Silt (%) | Coarse Silt (%) | Fine Sand (%) | Medium Sand (%) | Coarse Sand (%) |
|-----------|------------|-----------------------------------|----------|---------------|-----------------|-----------------|---------------|-----------------|-----------------|
| SB-10-D   | 10.0       | 43.6                              | 1.0      | 9.5           | 10.1            | 36.7            | 40.5          | 2.3             | 0.0             |
| SB-20-D   | 20.0       | 41.9                              | 1.0      | 9.7           | 10.4            | 37.5            | 39.7          | 1.7             | 0.0             |
| SB-30-D   | 30.0       | 46.3                              | 0.8      | 8.3           | 9.0             | 37.2            | 42.8          | 1.7             | 0.0             |
| SB-34-D   | 34.0       | 56.3                              | 0.6      | 7.0           | 7.8             | 32.8            | 46.9          | 4.9             | 0.0             |
| SB-40-D   | 40.0       | 66.2                              | 0.4      | 5.0           | 6.2             | 31.3            | 50.9          | 6.1             | 0.0             |
| SB-50-D   | 50.0       | 72.0                              | 0.5      | 6.3           | 6.3             | 26.1            | 50.8          | 10.1            | 0.0             |
| SB-60-D   | 60.0       | 53.2                              | 0.8      | 9.9           | 8.6             | 30.7            | 40.8          | 9.2             | 0.0             |
| SB-70-D   | 70.0       | 53.3                              | 0.8      | 10.3          | 8.9             | 29.9            | 39.8          | 10.3            | 0.0             |
| SB-80-D   | 80.0       | 48.8                              | 0.9      | 10.9          | 9.6             | 29.7            | 43.2          | 5.9             | 0.0             |
| SB-88-D   | 88.0       | 53.5                              | 0.8      | 9.6           | 9.2             | 29.3            | 43.1          | 8.1             | 0.0             |
| SB-94-D   | 94.0       | 45.7                              | 0.9      | 12.2          | 10.8            | 29.4            | 39.2          | 7.4             | 0.0             |
| SB-121-D  | 121.0      | 48.2                              | 0.9      | 10.8          | 9.8             | 31.2            | 40.2          | 7.2             | 0.0             |
| SB-126-D  | 126.0      | 64.7                              | 0.6      | 9.3           | 8.0             | 23.6            | 46.1          | 12.4            | 0.0             |
| SB-140-D  | 140.0      | 189.4                             | 0.0      | 1.6           | 2.0             | 13.5            | 32.5          | 39.1            | 11.3            |
| SB-150-D  | 150.0      | 189.9                             | 0.0      | 1.6           | 2.0             | 13.5            | 32.3          | 39.3            | 11.3            |
| SB-155-D  | 155.0      | 194.8                             | 0.0      | 1.6           | 1.9             | 13.0            | 31.5          | 40.1            | 11.9            |
| SB-160-D  | 160.0      | 196.6                             | 0.0      | 1.7           | 2.0             | 12.4            | 30.6          | 41.8            | 11.5            |

**Table S2.** Mean grain size and percentage of grain size fractions determined through the use of Calgon for the sediment samples of the Spitzbrunnen (SB) core.

| Sample ID | Depth (cm) | Mean grain size ( $\mu\text{m}$ ) | Clay (%) | Fine Silt (%) | Medium Silt (%) | Coarse Silt (%) | Fine Sand (%) | Medium Sand (%) | Coarse Sand (%) |
|-----------|------------|-----------------------------------|----------|---------------|-----------------|-----------------|---------------|-----------------|-----------------|
| SB-10-C   | 10.0       | 9.7                               | 12.0     | 31.9          | 18.3            | 29.8            | 8.0           | 0.1             | 0.0             |
| SB-20-C   | 20.0       | 9.6                               | 12.1     | 32.0          | 18.4            | 29.6            | 7.7           | 0.3             | 0.0             |
| SB-30-C   | 30.0       | 9.4                               | 12.2     | 32.1          | 18.6            | 29.6            | 7.2           | 0.2             | 0.0             |
| SB-34-C   | 34.0       | 5.1                               | 19.1     | 46.5          | 18.5            | 13.6            | 2.4           | 0.0             | 0.0             |
| SB-40-C   | 40.0       | 5.1                               | 19.2     | 46.7          | 18.5            | 13.5            | 2.1           | 0.0             | 0.0             |
| SB-50-C   | 50.0       | 3.3                               | 27.1     | 50.3          | 14.4            | 8.2             | 0.0           | 0.0             | 0.0             |
| SB-60-C   | 60.0       | 3.3                               | 27.1     | 50.3          | 14.5            | 8.1             | 0.0           | 0.0             | 0.0             |
| SB-70-C   | 70.0       | 3.3                               | 27.1     | 50.4          | 14.5            | 8.1             | 0.0           | 0.0             | 0.0             |
| SB-80-C   | 80.0       | 4.6                               | 18.9     | 50.5          | 20.9            | 9.6             | 0.1           | 0.0             | 0.0             |
| SB-88-C   | 88.0       | 4.6                               | 18.9     | 50.5          | 20.9            | 9.6             | 0.1           | 0.0             | 0.0             |
| SB-94-C   | 94.0       | 6.8                               | 12.9     | 42.9          | 22.5            | 15.9            | 4.0           | 1.8             | 0.1             |
| SB-121-C  | 121.0      | 6.5                               | 12.8     | 44.3          | 22.4            | 19.6            | 0.9           | 0.0             | 0.0             |
| SB-126-C  | 126.0      | 9.9                               | 9.2      | 38.6          | 19.7            | 22.1            | 10.4          | 0.0             | 0.0             |
| SB-140-C  | 140.0      | 172.6                             | 0.1      | 2.2           | 2.4             | 14.8            | 34.6          | 37.7            | 8.3             |
| SB-150-C  | 150.0      | 183.8                             | 0.0      | 2.0           | 2.2             | 13.7            | 32.6          | 39.3            | 10.2            |
| SB-155-C  | 155.0      | 183.9                             | 0.0      | 2.0           | 2.2             | 13.7            | 32.6          | 39.6            | 9.9             |
| SB-160-C  | 160.0      | 195.4                             | 0.0      | 1.8           | 2.0             | 12.5            | 30.6          | 41.9            | 11.2            |

**Table S3.** Mean grain size and percentage of grain size fractions determined through the use of Sodium oxalate for the sediment samples of the Spitzbrunnen (SB) core.

| Sample ID | Depth (cm) | Mean grain size ( $\mu\text{m}$ ) | Clay (%) | Fine Silt (%) | Medium Silt (%) | Coarse Silt (%) | Fine Sand (%) | Medium Sand (%) | Coarse Sand (%) |
|-----------|------------|-----------------------------------|----------|---------------|-----------------|-----------------|---------------|-----------------|-----------------|
| SB-10-O   | 10.0       | 10.0                              | 11.7     | 31.7          | 17.7            | 29.7            | 9.0           | 0.2             | 0.0             |
| SB-20-O   | 20.0       | 9.8                               | 11.6     | 32.5          | 17.6            | 29.3            | 8.4           | 0.6             | 0.0             |
| SB-30-O   | 30.0       | 9.5                               | 11.7     | 33.4          | 17.6            | 29.3            | 7.6           | 0.5             | 0.0             |
| SB-34-O   | 34.0       | 5.1                               | 19.6     | 46.5          | 17.6            | 13.3            | 2.8           | 0.2             | 0.0             |
| SB-40-O   | 40.0       | 5.1                               | 19.1     | 47.4          | 17.2            | 12.9            | 2.9           | 0.5             | 0.0             |
| SB-50-O   | 50.0       | 3.8                               | 23.8     | 52.0          | 15.1            | 9.1             | 0.0           | 0.0             | 0.0             |
| SB-60-O   | 60.0       | 3.8                               | 23.7     | 52.6          | 14.8            | 8.8             | 0.0           | 0.0             | 0.0             |
| SB-70-O   | 70.0       | 3.8                               | 23.8     | 52.0          | 15.1            | 9.1             | 0.0           | 0.0             | 0.0             |
| SB-80-O   | 80.0       | 4.3                               | 20.0     | 53.7          | 18.4            | 7.8             | 0.0           | 0.0             | 0.0             |
| SB-88-O   | 88.0       | 4.1                               | 20.8     | 53.8          | 18.2            | 7.1             | 0.0           | 0.0             | 0.0             |
| SB-94-O   | 94.0       | 6.6                               | 12.7     | 44.8          | 21.9            | 17.0            | 3.6           | 0.0             | 0.0             |
| SB-121-O  | 121.0      | 5.1                               | 19.0     | 45.3          | 20.1            | 15.5            | 0.0           | 0.0             | 0.0             |
| SB-126-O  | 126.0      | 8.4                               | 8.9      | 45.8          | 18.5            | 20.6            | 6.3           | 0.0             | 0.0             |
| SB-140-O  | 140.0      | 103.2                             | 0.5      | 9.2           | 4.0             | 17.1            | 37.1          | 27.5            | 4.6             |
| SB-150-O  | 150.0      | 118.7                             | 0.5      | 7.5           | 3.6             | 16.9            | 37.0          | 29.5            | 5.1             |
| SB-155-O  | 155.0      | 123.6                             | 0.5      | 7.2           | 3.5             | 16.5            | 36.4          | 30.1            | 5.8             |
| SB-160-O  | 160.0      | 123.6                             | 0.5      | 7.2           | 3.5             | 16.5            | 36.4          | 30.1            | 5.8             |

**Table S4.** Mean grain size and percentage of grain size fractions determined through the use of Sodium pyrophosphate for the sediment samples of the Spitzbrunnen (SB) core.

| Sample ID | Depth (cm) | Mean grain size ( $\mu\text{m}$ ) | Clay (%) | Fine Silt (%) | Medium Silt (%) | Coarse Silt (%) | Fine Sand (%) | Medium Sand (%) | Coarse Sand (%) |
|-----------|------------|-----------------------------------|----------|---------------|-----------------|-----------------|---------------|-----------------|-----------------|
| SB-10-P   | 10.0       | 11.9                              | 9.5      | 28.8          | 19.2            | 30.6            | 10.9          | 1.0             | 0.0             |
| SB-20-P   | 20.0       | 11.7                              | 9.7      | 28.9          | 19.2            | 30.5            | 10.5          | 1.2             | 0.0             |
| SB-30-P   | 30.0       | 11.5                              | 9.9      | 29.1          | 19.3            | 30.5            | 10.2          | 1.1             | 0.0             |
| SB-34-P   | 34.0       | 5.3                               | 18.1     | 46.9          | 18.6            | 13.5            | 2.9           | 0.0             | 0.0             |
| SB-40-P   | 40.0       | 5.2                               | 18.4     | 47.2          | 18.6            | 13.5            | 2.2           | 0.0             | 0.0             |
| SB-50-P   | 50.0       | 5.1                               | 20.0     | 45.7          | 16.7            | 17.3            | 0.2           | 0.0             | 0.0             |
| SB-60-P   | 60.0       | 5.1                               | 20.2     | 45.6          | 16.7            | 17.2            | 0.3           | 0.0             | 0.0             |
| SB-70-P   | 70.0       | 5.1                               | 20.4     | 45.5          | 16.7            | 17.1            | 0.4           | 0.0             | 0.0             |
| SB-80-P   | 80.0       | 7.5                               | 13.2     | 42.6          | 19.4            | 13.8            | 7.8           | 2.7             | 0.6             |
| SB-88-P   | 88.0       | 7.8                               | 12.7     | 43.3          | 18.7            | 13.2            | 7.2           | 3.6             | 1.3             |
| SB-94-P   | 94.0       | 6.8                               | 11.6     | 43.9          | 23.4            | 20.1            | 0.9           | 0.1             | 0.0             |
| SB-121-P  | 121.0      | 6.7                               | 12.9     | 43.7          | 21.5            | 19.4            | 2.5           | 0.0             | 0.0             |
| SB-126-P  | 126.0      | 9.2                               | 9.0      | 40.1          | 20.3            | 22.5            | 8.2           | 0.0             | 0.0             |
| SB-140-P  | 140.0      | 166.6                             | 0.0      | 1.6           | 2.1             | 16.0            | 37.8          | 32.7            | 9.8             |
| SB-150-P  | 150.0      | 168.1                             | 0.0      | 1.8           | 2.1             | 15.7            | 37.5          | 32.2            | 10.6            |
| SB-155-P  | 155.0      | 168.8                             | 0.0      | 1.7           | 2.1             | 15.7            | 37.5          | 32.8            | 10.3            |
| SB-160-P  | 160.0      | 168.8                             | 0.0      | 1.7           | 2.1             | 15.7            | 37.5          | 32.8            | 10.3            |

**Table S5.** Mean grain size and percentage of grain size fractions determined through the use of Sodium tripolyphosphate for the sediment samples of the Spitzbrunnen (SB) core.

| Sample ID | Depth (cm) | Mean grain size (µm) | Clay (%) | Fine Silt (%) | Medium Silt (%) | Coarse Silt (%) | Fine Sand (%) | Medium Sand (%) | Coarse Sand (%) |
|-----------|------------|----------------------|----------|---------------|-----------------|-----------------|---------------|-----------------|-----------------|
| SB-10-T   | 10.0       | 9.7                  | 11.5     | 31.4          | 19.7            | 30.3            | 6.7           | 0.4             | 0.0             |
| SB-20-T   | 20.0       | 9.6                  | 11.6     | 31.6          | 19.8            | 30.4            | 6.5           | 0.3             | 0.0             |
| SB-30-T   | 30.0       | 9.4                  | 11.7     | 31.8          | 19.9            | 30.5            | 6.0           | 0.1             | 0.0             |
| SB-34-T   | 34.0       | 5.3                  | 18.9     | 45.6          | 18.4            | 13.4            | 3.6           | 0.2             | 0.0             |
| SB-40-T   | 40.0       | 5.2                  | 19.0     | 45.7          | 18.4            | 13.4            | 3.5           | 0.1             | 0.0             |
| SB-50-T   | 50.0       | 3.5                  | 25.6     | 51.6          | 14.8            | 8.0             | 0.0           | 0.0             | 0.0             |
| SB-60-T   | 60.0       | 3.5                  | 25.7     | 51.6          | 14.9            | 7.8             | 0.0           | 0.0             | 0.0             |
| SB-70-T   | 70.0       | 3.4                  | 25.7     | 51.7          | 14.9            | 7.7             | 0.0           | 0.0             | 0.0             |
| SB-80-T   | 80.0       | 4.9                  | 16.8     | 51.7          | 21.8            | 9.6             | 0.0           | 0.0             | 0.0             |
| SB-88-T   | 88.0       | 4.9                  | 16.9     | 51.8          | 21.8            | 9.5             | 0.0           | 0.0             | 0.0             |
| SB-94-T   | 94.0       | 7.1                  | 11.2     | 43.2          | 23.3            | 16.6            | 5.2           | 0.4             | 0.1             |
| SB-121-T  | 121.0      | 6.8                  | 11.8     | 43.8          | 22.5            | 19.8            | 2.0           | 0.0             | 0.0             |
| SB-126-T  | 126.0      | 8.8                  | 9.0      | 40.9          | 20.9            | 19.9            | 9.2           | 0.0             | 0.0             |
| SB-140-T  | 140.0      | 185.5                | 0.0      | 1.7           | 2.0             | 13.9            | 33.0          | 38.6            | 10.7            |
| SB-150-T  | 150.0      | 189.4                | 0.0      | 1.6           | 2.0             | 13.6            | 32.5          | 39.1            | 11.3            |
| SB-155-T  | 155.0      | 189.8                | 0.0      | 1.6           | 2.0             | 13.5            | 32.3          | 39.3            | 11.3            |
| SB-160-T  | 160.0      | 189.8                | 0.0      | 1.6           | 2.0             | 13.5            | 32.3          | 39.3            | 11.3            |

**Table S6.** Mean grain size and percentage of grain size fractions determined through the use of distilled water for the sediment samples of the Daschsbrunnen (DB) core.

| Sample ID | Depth (cm) | Mean grain size ( $\mu\text{m}$ ) | Clay (%) | Fine Silt (%) | Medium Silt (%) | Coarse Silt (%) | Fine Sand (%) | Medium Sand (%) | Coarse Sand (%) |
|-----------|------------|-----------------------------------|----------|---------------|-----------------|-----------------|---------------|-----------------|-----------------|
| DB-10-D   | 10.0       | 63.7                              | 0.4      | 6.9           | 7.9             | 29.9            | 44.1          | 10.8            | 0.0             |
| DB-20-D   | 20.0       | 61.0                              | 0.5      | 7.2           | 7.8             | 31.0            | 44.5          | 8.9             | 0.0             |
| DB-30-D   | 30.0       | 63.8                              | 0.4      | 6.5           | 7.6             | 31.7            | 43.9          | 9.9             | 0.0             |
| DB-40-D   | 40.0       | 48.4                              | 0.8      | 10.8          | 9.1             | 32.4            | 40.3          | 6.6             | 0.0             |
| DB-50-D   | 50.0       | 56.5                              | 0.7      | 9.5           | 8.4             | 30.1            | 41.6          | 9.7             | 0.0             |
| DB-60-D   | 60.0       | 51.1                              | 0.8      | 9.7           | 9.1             | 33.5            | 38.5          | 8.4             | 0.0             |
| DB-70-D   | 70.0       | 42.7                              | 0.8      | 9.5           | 9.7             | 39.0            | 39.5          | 1.6             | 0.0             |
| DB-80-D   | 80.0       | 44.1                              | 0.7      | 8.4           | 9.1             | 40.0            | 40.7          | 1.0             | 0.0             |
| DB-80-D   | 88.0       | 87.6                              | 0.1      | 2.5           | 4.1             | 28.8            | 51.7          | 12.8            | 0.0             |
| DB-95-D   | 95.0       | 115.1                             | 0.0      | 1.9           | 2.5             | 18.3            | 61.5          | 15.9            | 0.0             |
| DB-107-D  | 107.0      | 254.6                             | 0.1      | 2.0           | 1.5             | 5.5             | 35.0          | 48.6            | 7.3             |
| DB-120-D  | 120.0      | 253.9                             | 0.1      | 1.9           | 1.4             | 5.3             | 35.9          | 48.6            | 6.8             |
| DB-130-D  | 130.0      | 248.3                             | 0.1      | 2.0           | 1.4             | 5.4             | 37.5          | 46.9            | 6.7             |
| DB-140-D  | 140.0      | 120.6                             | 0.3      | 4.4           | 3.6             | 11.0            | 62.6          | 18.1            | 0.0             |
| DB-150-D  | 150.0      | 134.4                             | 0.3      | 4.2           | 3.3             | 9.1             | 62.7          | 20.4            | 0.0             |
| DB-160-D  | 160.0      | 122.4                             | 0.3      | 4.3           | 3.6             | 10.6            | 63.1          | 18.2            | 0.0             |

**Table S7.** Mean grain size and percentage of grain size fractions determined through the use of Calgon for the sediment samples of the Daschsbrunnen (DB) core.

| Sample ID | Depth (cm) | Mean grain size ( $\mu\text{m}$ ) | Clay (%) | Fine Silt (%) | Medium Silt (%) | Coarse Silt (%) | Fine Sand (%) | Medium Sand (%) | Coarse Sand (%) |
|-----------|------------|-----------------------------------|----------|---------------|-----------------|-----------------|---------------|-----------------|-----------------|
| DB-10-C   | 10.0       | 5.8                               | 18.7     | 43.3          | 17.3            | 16.2            | 4.6           | 0.0             | 0.0             |
| DB-20-C   | 20.0       | 4.5                               | 21.2     | 47.7          | 18.1            | 11.9            | 1.0           | 0.0             | 0.0             |
| DB-30-C   | 30.0       | 4.5                               | 21.3     | 47.8          | 18.1            | 11.8            | 1.0           | 0.0             | 0.0             |
| DB-40-C   | 40.0       | 4.7                               | 21.0     | 47.3          | 16.9            | 13.8            | 1.0           | 0.0             | 0.0             |
| DB-50-C   | 50.0       | 4.7                               | 20.9     | 47.2          | 16.8            | 13.7            | 1.3           | 0.0             | 0.0             |
| DB-60-C   | 60.0       | 4.7                               | 20.9     | 47.2          | 16.8            | 13.7            | 1.3           | 0.0             | 0.0             |
| DB-70-C   | 70.0       | 4.8                               | 20.6     | 47.1          | 16.8            | 13.7            | 1.9           | 0.0             | 0.0             |
| DB-80-C   | 80.0       | 8.3                               | 12.4     | 39.1          | 16.6            | 25.4            | 6.5           | 0.0             | 0.0             |
| DB-80-C   | 88.0       | 8.3                               | 12.3     | 39.2          | 16.6            | 25.4            | 6.4           | 0.0             | 0.0             |
| DB-95-C   | 95.0       | 73.1                              | 0.3      | 4.0           | 4.9             | 31.1            | 53.2          | 6.6             | 0.0             |
| DB-107-C  | 107.0      | 75.0                              | 0.3      | 3.9           | 4.8             | 30.2            | 53.9          | 7.0             | 0.0             |
| DB-120-C  | 120.0      | 256.8                             | 0.2      | 2.9           | 2.3             | 6.8             | 28.3          | 49.7            | 9.8             |
| DB-130-C  | 130.0      | 253.9                             | 0.2      | 2.9           | 2.2             | 6.8             | 29.3          | 49.7            | 8.8             |
| DB-140-C  | 140.0      | 110.3                             | 0.3      | 5.0           | 4.4             | 12.4            | 58.7          | 19.2            | 0.0             |
| DB-150-C  | 150.0      | 108.4                             | 0.3      | 5.1           | 4.5             | 12.7            | 58.3          | 19.1            | 0.0             |
| DB-160-C  | 160.0      | 113.0                             | 0.3      | 4.9           | 4.2             | 12.1            | 58.1          | 20.3            | 0.1             |

**Table S8.** Mean grain size and percentage of grain size fractions determined through the use of Sodium oxalate for the sediment samples of the Daschsbrunnen (DB) core.

| Sample ID | Depth (cm) | Mean grain size (µm) | Clay (%) | Fine Silt (%) | Medium Silt (%) | Coarse Silt (%) | Fine Sand (%) | Medium Sand (%) | Coarse Sand (%) |
|-----------|------------|----------------------|----------|---------------|-----------------|-----------------|---------------|-----------------|-----------------|
| DB-10-O   | 10.0       | 5.7                  | 16.5     | 48.6          | 16.4            | 14.4            | 4.1           | 0.0             | 0.0             |
| DB-20-O   | 20.0       | 4.8                  | 20.2     | 46.9          | 18.6            | 13.0            | 1.3           | 0.0             | 0.0             |
| DB-30-O   | 30.0       | 4.8                  | 20.2     | 47.2          | 18.5            | 12.8            | 1.3           | 0.0             | 0.0             |
| DB-40-O   | 40.0       | 5.8                  | 15.7     | 45.8          | 20.3            | 16.7            | 1.4           | 0.0             | 0.0             |
| DB-50-O   | 50.0       | 5.8                  | 15.7     | 45.8          | 20.3            | 16.7            | 1.5           | 0.0             | 0.0             |
| DB-60-O   | 60.0       | 5.8                  | 15.7     | 45.8          | 20.3            | 16.7            | 1.5           | 0.0             | 0.0             |
| DB-70-O   | 70.0       | 5.8                  | 15.7     | 45.8          | 20.3            | 16.8            | 1.4           | 0.0             | 0.0             |
| DB-80-O   | 80.0       | 8.5                  | 12.1     | 36.7          | 19.0            | 27.4            | 4.8           | 0.0             | 0.0             |
| DB-80-O   | 88.0       | 8.5                  | 12.0     | 36.6          | 18.9            | 27.6            | 4.9           | 0.0             | 0.0             |
| DB-95-O   | 95.0       | 56.1                 | 0.4      | 5.0           | 6.2             | 39.9            | 46.3          | 2.2             | 0.0             |
| DB-107-O  | 107.0      | 56.3                 | 0.4      | 5.0           | 6.2             | 39.7            | 46.6          | 2.1             | 0.0             |
| DB-120-O  | 120.0      | 261.5                | 2.3      | 7.8           | 3.9             | 7.1             | 35.0          | 41.0            | 3.0             |
| DB-130-O  | 130.0      | 272.4                | 2.3      | 8.0           | 3.9             | 7.2             | 35.4          | 40.4            | 2.8             |
| DB-140-O  | 140.0      | 98.5                 | 0.3      | 4.7           | 8.0             | 22.5            | 51.8          | 12.7            | 0.0             |
| DB-150-O  | 150.0      | 97.7                 | 0.3      | 4.7           | 8.1             | 22.7            | 51.3          | 12.9            | 0.0             |
| DB-160-O  | 160.0      | 86.2                 | 0.2      | 4.4           | 7.4             | 21.1            | 52.0          | 14.9            | 0.0             |

**Table S9.** Mean grain size and percentage of grain size fractions determined through the use of Sodium pyrophosphate for the sediment samples of the Daschsbrunnen (DB) core.

| Sample ID | Depth (cm) | Mean grain size (µm) | Clay (%) | Fine Silt (%) | Medium Silt (%) | Coarse Silt (%) | Fine Sand (%) | Medium Sand (%) | Coarse Sand (%) |
|-----------|------------|----------------------|----------|---------------|-----------------|-----------------|---------------|-----------------|-----------------|
| DB-10-P   | 10.0       | 5.7                  | 17.1     | 46.5          | 17.6            | 15.4            | 3.2           | 0.2             | 0.0             |
| DB-20-P   | 20.0       | 5.2                  | 18.4     | 46.9          | 18.9            | 13.7            | 2.1           | 0.0             | 0.0             |
| DB-30-P   | 30.0       | 5.1                  | 18.5     | 47.0          | 18.9            | 13.9            | 1.7           | 0.0             | 0.0             |
| DB-40-P   | 40.0       | 14.2                 | 8.8      | 26.6          | 14.5            | 35.8            | 14.3          | 0.0             | 0.0             |
| DB-50-P   | 50.0       | 14.2                 | 8.8      | 26.7          | 14.6            | 35.9            | 14.1          | 0.0             | 0.0             |
| DB-60-P   | 60.0       | 14.2                 | 8.8      | 26.6          | 14.5            | 35.8            | 14.3          | 0.0             | 0.0             |
| DB-70-P   | 70.0       | 14.0                 | 8.9      | 26.9          | 14.6            | 35.8            | 13.7          | 0.0             | 0.0             |
| DB-80-P   | 80.0       | 11.3                 | 8.1      | 28.8          | 20.9            | 36.7            | 5.6           | 0.0             | 0.0             |
| DB-80-P   | 88.0       | 11.4                 | 7.9      | 28.7          | 20.9            | 36.7            | 5.8           | 0.0             | 0.0             |
| DB-95-P   | 95.0       | 72.3                 | 0.3      | 4.2           | 5.6             | 30.2            | 52.7          | 7.1             | 0.0             |
| DB-107-P  | 107.0      | 73.9                 | 0.3      | 4.1           | 5.5             | 29.7            | 52.7          | 7.7             | 0.0             |
| DB-120-P  | 120.0      | 249.1                | 0.2      | 3.1           | 2.3             | 5.4             | 34.0          | 48.4            | 6.6             |
| DB-130-P  | 130.0      | 245.2                | 0.2      | 3.3           | 2.4             | 5.5             | 34.2          | 48.4            | 6.1             |
| DB-140-P  | 140.0      | 97.1                 | 0.5      | 6.5           | 5.2             | 12.8            | 58.0          | 17.1            | 0.0             |
| DB-150-P  | 150.0      | 91.9                 | 0.5      | 6.9           | 5.5             | 13.3            | 58.2          | 15.6            | 0.0             |
| DB-160-P  | 160.0      | 93.8                 | 0.4      | 6.8           | 5.4             | 13.0            | 58.5          | 15.9            | 0.0             |

**Table S10.** Mean grain size and percentage of grain size fractions determined through the use of Sodium tripolyphosphate for the sediment samples of the Daschsbrunnen (DB) core.

| Sample ID | Depth (cm) | Mean grain size (µm) | Clay (%) | Fine Silt (%) | Medium Silt (%) | Coarse Silt (%) | Fine Sand (%) | Medium Sand (%) | Coarse Sand (%) |
|-----------|------------|----------------------|----------|---------------|-----------------|-----------------|---------------|-----------------|-----------------|
| DB-10-T   | 10.0       | 6.2                  | 15.6     | 45.5          | 17.7            | 16.3            | 4.9           | 0.0             | 0.0             |
| DB-20-T   | 20.0       | 5.6                  | 17.2     | 46.2          | 18.7            | 14.8            | 3.0           | 0.0             | 0.0             |
| DB-30-T   | 30.0       | 5.5                  | 17.3     | 46.2          | 18.7            | 14.7            | 3.0           | 0.0             | 0.0             |
| DB-40-T   | 40.0       | 4.7                  | 21.2     | 46.1          | 16.8            | 13.7            | 2.2           | 0.0             | 0.0             |
| DB-50-T   | 50.0       | 4.7                  | 21.3     | 46.1          | 16.8            | 13.7            | 2.1           | 0.0             | 0.0             |
| DB-60-T   | 60.0       | 4.7                  | 21.3     | 46.2          | 16.8            | 13.8            | 1.9           | 0.0             | 0.0             |
| DB-70-T   | 70.0       | 4.7                  | 21.3     | 46.0          | 16.7            | 13.7            | 2.2           | 0.0             | 0.0             |
| DB-80-T   | 80.0       | 10.2                 | 12.9     | 29.5          | 17.2            | 31.5            | 8.8           | 0.1             | 0.0             |
| DB-80-T   | 88.0       | 10.3                 | 12.8     | 29.5          | 17.2            | 31.6            | 8.9           | 0.1             | 0.0             |
| DB-95-T   | 95.0       | 68.5                 | 0.3      | 4.3           | 5.3             | 33.8            | 50.2          | 6.2             | 0.0             |
| DB-107-T  | 107.0      | 70.3                 | 0.3      | 4.1           | 5.2             | 33.1            | 50.3          | 6.9             | 0.0             |
| DB-120-T  | 120.0      | 261.5                | 0.2      | 2.9           | 2.3             | 6.6             | 27.6          | 50.1            | 10.3            |
| DB-130-T  | 130.0      | 251.6                | 0.2      | 3.1           | 2.4             | 7.0             | 28.1          | 49.0            | 10.2            |
| DB-140-T  | 140.0      | 109.4                | 0.4      | 5.0           | 4.3             | 12.3            | 59.0          | 18.9            | 0.0             |
| DB-150-T  | 150.0      | 107.4                | 0.4      | 5.1           | 4.5             | 12.6            | 59.2          | 18.3            | 0.0             |
| DB-160-T  | 160.0      | 108.5                | 0.4      | 5.1           | 4.4             | 12.3            | 59.7          | 18.1            | 0.0             |

**Table S11.** Mean grain size and percentage of grain size fractions determined through the use of different chemical dispersing agents for IL 1A and IL 1B sediment samples.

| Sample ID | Treatment Method   | Dispersant              | Mean grain size (µm) | Clay (%) | Fine silt (%) | Medium silt (%) | Coarse silt (%) | Fine sand (%) | Medium sand (%) | Coarse sand (%) |
|-----------|--------------------|-------------------------|----------------------|----------|---------------|-----------------|-----------------|---------------|-----------------|-----------------|
| IL-1A-C   | Hydrogen peroxide  | Calgon                  | 15.3                 | 9.5      | 27.0          | 13.6            | 29.2            | 20.7          | 0.1             | 0.0             |
| IL-1A-O   | Hydrogen peroxide  | Sodium oxalate          | 15.4                 | 3.6      | 30.0          | 18.4            | 31.8            | 15.5          | 0.6             | 0.0             |
| IL-1A-P   | Hydrogen peroxide  | Sodium pyrophosphate    | 17.9                 | 6.2      | 24.5          | 14.8            | 33.8            | 20.0          | 0.7             | 0.0             |
| IL-1A-T   | Hydrogen peroxide  | Sodium tripolyphosphate | 19.1                 | 5.6      | 24.5          | 15.4            | 31.1            | 23.0          | 0.4             | 0.0             |
| IL-1B-C   | Thermal combustion | Calgon                  | 35.8                 | 2.7      | 12.2          | 10.0            | 39.0            | 33.3          | 2.8             | 0.0             |
| IL-1B-O   | Thermal combustion | Sodium oxalate          | 30.0                 | 2.8      | 16.0          | 13.9            | 34.2            | 31.0          | 2.1             | 0.0             |
| IL-1B-P   | Thermal combustion | Sodium pyrophosphate    | 33.9                 | 2.8      | 13.5          | 11.0            | 36.6            | 33.0          | 3.1             | 0.0             |
| IL-1B-T   | Thermal combustion | Sodium tripolyphosphate | 43.3                 | 2.3      | 11.2          | 8.9             | 33.6            | 38.6          | 5.3             | 0.0             |

**Table S12.** Mean grain size and percentage of grain size fractions determined through the use of different chemical dispersing agents for IL 2A and IL 2B sediment samples.

| Sample ID | Treatment method   | Dispersant              | Mean grain size (µm) | Clay (%) | Fine silt (%) | Medium silt (%) | Coarse silt (%) | Fine sand (%) | Medium sand (%) | Coarse sand (%) |
|-----------|--------------------|-------------------------|----------------------|----------|---------------|-----------------|-----------------|---------------|-----------------|-----------------|
| IL-2A-C   | Hydrogen peroxide  | Calgon                  | 17.1                 | 6.6      | 27.8          | 14.9            | 27.9            | 22.4          | 0.4             | 0.0             |
| IL-2A-O   | Hydrogen peroxide  | Sodium oxalate          | 15.5                 | 3.2      | 29.4          | 20.3            | 31.3            | 15.8          | 0.0             | 0.0             |
| IL-2A-P   | Hydrogen peroxide  | Sodium pyrophosphate    | 17.6                 | 5.9      | 25.6          | 16.4            | 31.2            | 20.8          | 0.2             | 0.0             |
| IL-2A-T   | Hydrogen peroxide  | Sodium tripolyphosphate | 19.6                 | 5.5      | 24.3          | 15.2            | 30.8            | 23.8          | 0.4             | 0.0             |
| IL-2B-C   | Thermal combustion | Calgon                  | 38.0                 | 2.6      | 13.2          | 10.0            | 33.8            | 35.3          | 5.1             | 0.0             |
| IL-2B-O   | Thermal combustion | Sodium oxalate          | 31.6                 | 2.3      | 15.5          | 14.7            | 32.6            | 32.5          | 2.4             | 0.0             |
| IL-2B-P   | Thermal combustion | Sodium pyrophosphate    | 35.6                 | 2.5      | 13.8          | 11.4            | 33.5            | 35.5          | 3.3             | 0.0             |
| IL-2B-T   | Thermal combustion | Sodium tripolyphosphate | 41.4                 | 2.3      | 12.2          | 9.4             | 32.6            | 38.6          | 5.0             | 0.0             |
